# Supplementary material for: GenCoNet – A Graph Database for the Analysis of Comorbidities by Gene Networks
Source: publisher site journal article supplement (doi:10.1515/jib-2018-0049), 2018-12-01
Supplement: Supplementary file 1 [file Supplementary Material.docx]

# Supplementary Material

The online version of these supplementary tables is also available at https://genconet.kalis-amts.de.

**Supplementary Table 1: Positive list of drugs.**

| **DrugBank ID** | **Drug name** | **Treatment of disease** |
| --- | --- | --- |
| DB09273 | Doxofylline | Asthma |
| DB13139 | Levosalbutamol | Asthma |
| DB08979 | Fenspiride | Asthma |
| DB09076 | Umeclidinium bromide | Asthma |
| DB00043 | Omalizumab | Asthma |
| DB00180 | Flunisolide | Asthma |
| DB00221 | Isoetarine | Asthma |
| DB00332 | Ipratropium bromide | Asthma |
| DB00394 | Beclometasone | Asthma |
| DB00443 | Betamethasone | Asthma |
| DB00471 | Montelukast | Asthma |
| DB00549 | Zafirlukast | Asthma |
| DB00651 | Dyphylline | Asthma |
| DB00716 | Nedocromil | Asthma |
| DB00744 | Zileuton | Asthma |
| DB00764 | Mometasone | Asthma |
| DB00824 | Enprofylline | Asthma |
| DB00816 | Orciprenaline | Asthma |
| DB00871 | Terbutaline | Asthma |
| DB00920 | Ketotifen | Asthma |
| DB00901 | Bitolterol | Asthma |
| DB00983 | Formoterol | Asthma |
| DB00938 | Salmeterol | Asthma |
| DB01001 | Salbutamol | Asthma |
| DB00986 | Glycopyrronium bromide | Asthma |
| DB01025 | Amlexanox | Asthma |
| DB01003 | Cromoglicate | Asthma |
| DB01222 | Budesonide | Asthma |
| DB01064 | Isoprenaline | Asthma |
| DB01288 | Fenoterol | Asthma |
| DB01366 | Procaterol | Asthma |
| DB01407 | Clenbuterol | Asthma |
| DB01291 | Pirbuterol | Asthma |
| DB01410 | Ciclesonide | Asthma |
| DB01411 | Pranlukast | Asthma |
| DB01408 | Bambuterol | Asthma |
| DB01409 | Tiotropium | Asthma |
| DB01656 | Roflumilast | Asthma |
| DB05039 | Indacaterol | Asthma |
| DB08906 | Fluticasone furoate | Asthma |
| DB08957 | Hexoprenaline | Asthma |
| DB06612 | Mepolizumab | Asthma |
| DB08897 | Aclidinium | Asthma |
| DB09082 | Vilanterol | Asthma |
| DB09080 | Olodaterol | Asthma |
| DB00436 | Bendroflumethiazide | Hypertension |
| DB00457 | Prazosin | Hypertension |
| DB00524 | Metolazone | Hypertension |
| DB00528 | Lercanidipine | Hypertension |
| DB00325 | Nitroprusside | Hypertension |
| DB00343 | Diltiazem | Hypertension |
| DB00381 | Amlodipine | Hypertension |
| DB00384 | Triamterene | Hypertension |
| DB00212 | Remikiren | Hypertension |
| DB00206 | Reserpine | Hypertension |
| DB00226 | Guanadrel | Hypertension |
| DB00214 | Torasemide | Hypertension |
| DB00270 | Isradipine | Hypertension |
| DB00310 | Chlorthalidone | Hypertension |
| DB00275 | Olmesartan | Hypertension |
| DB00177 | Valsartan | Hypertension |
| DB00187 | Esmolol | Hypertension |
| DB09236 | Lacidipine | Hypertension |
| DB09242 | Moxonidine | Hypertension |
| DB01349 | Tasosartan | Hypertension |
| DB01275 | Hydralazine | Hypertension |
| DB08822 | Azilsartan medoxomil | Hypertension |
| DB00590 | Doxazosin | Hypertension |
| DB05739 | CYT006-AngQb | Hypertension |
| DB00575 | Clonidine | Hypertension |
| DB00657 | Mecamylamine | Hypertension |
| DB09026 | Aliskiren | Hypertension |
| DB00629 | Guanabenz | Hypertension |
| DB00880 | Chlorothiazide | Hypertension |
| DB00678 | Losartan | Hypertension |
| DB00695 | Furosemide | Hypertension |
| DB00692 | Phentolamine | Hypertension |
| DB00966 | Telmisartan | Hypertension |
| DB00968 | Methyldopa | Hypertension |
| DB00700 | Eplerenone | Hypertension |
| DB00742 | Mannitol | Hypertension |
| DB00796 | Candesartan | Hypertension |
| DB00808 | Indapamide | Hypertension |
| DB00876 | Eprosartan | Hypertension |
| DB01162 | Terazosin | Hypertension |
| DB01158 | Bretylium | Hypertension |
| DB01116 | Trimethaphan | Hypertension |
| DB01170 | Guanethidine | Hypertension |
| DB01023 | Felodipine | Hypertension |
| DB01018 | Guanfacine | Hypertension |
| DB00999 | Hydrochlorothiazide | Hypertension |
| DB01090 | Pentolinium | Hypertension |
| DB01089 | Deserpidine | Hypertension |
| DB01054 | Nitrendipine | Hypertension |

**Supplementary Table 2: Negative list of drugs.**

| **DrugBank ID** | **Drug name** | **Treatment of disease** | **Negative impact on comorbidity** |
| --- | --- | --- | --- |
| DB00492 | Fosinopril | Hypertension | Asthma |
| DB00519 | Trandolapril | Hypertension | Asthma |
| DB00178 | Ramipril | Hypertension | Asthma |
| DB00335 | Atenolol | Hypertension | Asthma |
| DB01348 | Spirapril | Hypertension | Asthma |
| DB01626 | Pargyline | Hypertension | Asthma |
| DB01580 | Oxprenolol | Hypertension | Asthma |
| DB01214 | Metipranolol | Hypertension | Asthma |
| DB08836 | Temocapril | Hypertension | Asthma |
| DB01340 | Cilazapril | Hypertension | Asthma |
| DB00264 | Metoprolol | Hypertension | Asthma |
| DB09477 | Enalaprilat | Hypertension | Asthma |
| DB00622 | Nicardipine | Hypertension | Asthma |
| DB00691 | Moexipril | Hypertension | Asthma |
| DB00542 | Benazepril | Hypertension | Asthma |
| DB00584 | Enalapril | Hypertension | Asthma |
| DB00594 | Amiloride | Hypertension | Asthma |
| DB00612 | Bisoprolol | Hypertension | Asthma |
| DB01197 | Captopril | Hypertension | Asthma |
| DB00722 | Lisinopril | Hypertension | Asthma |
| DB01193 | Acebutolol | Hypertension | Asthma |
| DB01180 | Rescinnamine | Hypertension | Asthma |
| DB01029 | Irbesartan | Hypertension | Asthma |
| DB00790 | Perindopril | Hypertension | Asthma |
| DB04846 | Celiprolol | Hypertension | Asthma |
| DB00797 | Tolazoline | Hypertension | Asthma |
| DB01115 | Nifedipine | Hypertension | Asthma |
| DB04861 | Nebivolol | Hypertension | Asthma |
| DB00881 | Quinapril | Hypertension | Asthma |
| DB00925 | Phenoxybenzamine | Hypertension | Asthma |
| DB00195 | Betaxolol | Hypertension | Asthma |
| DB00350 | Minoxidil | Hypertension | Asthma |
| DB00661 | Verapamil | Hypertension | Asthma |
| DB00421 | Spironolactone | Hypertension | Asthma |
| DB00393 | Nimodipine | Hypertension | Asthma |
| DB01203 | Nadolol | Hypertension | Asthma |
| DB00489 | Sotalol | Hypertension | Asthma |
| DB00598 | Labetalol | Hypertension | Asthma |
| DB00571 | Propranolol | Hypertension | Asthma |
| DB00373 | Timolol | Hypertension | Asthma |
| DB01136 | Carvedilol | Hypertension | Asthma |
| DB00960 | Pindolol | Hypertension | Asthma |
| DB00277 | Theophylline | Asthma | Hypertension |
| DB00588 | Fluticasone Propionate | Asthma | Hypertension |
| DB01223 | Aminophylline | Asthma | Hypertension |
| DB01303 | Oxtriphylline | Asthma | Hypertension |
| DB05266 | Ibudilast | Asthma | Hypertension |
| DB00620 | Triamcinolone | Asthma | Hypertension |
| DB01363 | Ephedra | Asthma | Hypertension |
| DB00668 | Epinephrine | Asthma | Hypertension |
| DB00860 | Prednisolone | Asthma | Hypertension |
